# Supplementary material for: Two-in-one: cathode modification and improved solar cell blend stability through addition of modified fullerenes
Source: Royal Society of Chemistry journal article supplement (doi:10.1039/c5ta06420a), 2016-01-01
Supplement: c5ta06420a1.pdf [file c5ta06420a1.pdf]

## Supplementary information

### Two-in-one: cathode modification and improved solar cell blend stability through addition of modified fullerenes

Zandra George,<sup>a</sup> Yuxin Xia,<sup>b</sup> Anirudh Sharma,<sup>c</sup> Camilla Lindqvist,<sup>d</sup> Gunther Andersson,<sup>e</sup> Olle Inganäs,<sup>b</sup> Ellen Moons,<sup>d</sup> Christian Müller,<sup>a</sup> Mats R. Andersson<sup>a,c\*</sup>

<sup>a</sup> Department of Chemistry and Chemical Engineering, Chalmers University of Technology SE-412 96 Gothenburg, Sweden

<sup>b</sup> Biomolecular and Organic Electronics, IFM, and Center of Organic Electronics, Linköping University, SE-581 83 Linköping, Sweden

<sup>c</sup> Future Industries Institute, University of South Australia, Mawson Lakes, South Australia 5095, Australia.

<sup>d</sup> Department of Engineering and Physics, Karlstad University, SE-65188 Karlstad, Sweden

<sup>e</sup> Flinders Centre for NanoScale Science and Technology, Flinders University, Sturt Road, Bedford Park, Adelaide, SA 5042, Australia

\* [mats.andersson@unisa.edu.au](mailto:mats.andersson@unisa.edu.au)

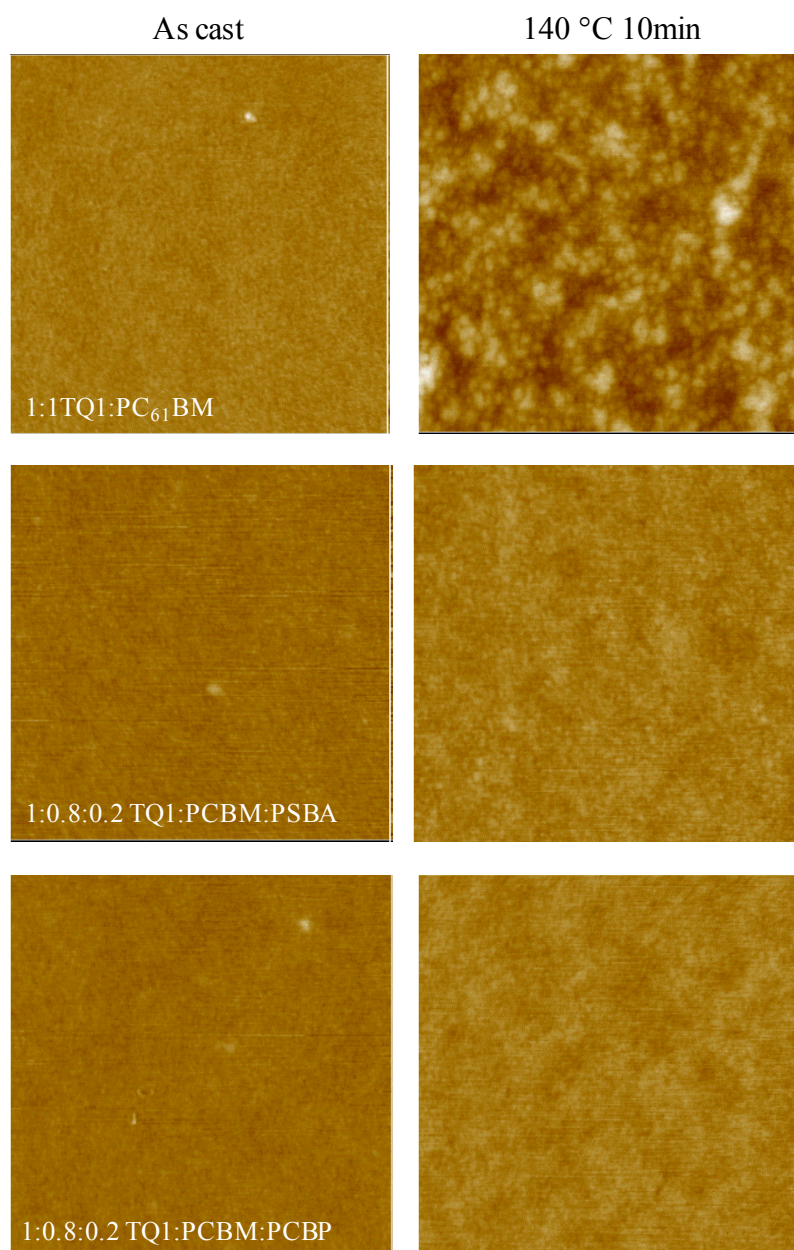

Figure S1. AFM before and after annealing at 140 °C for 10 min.

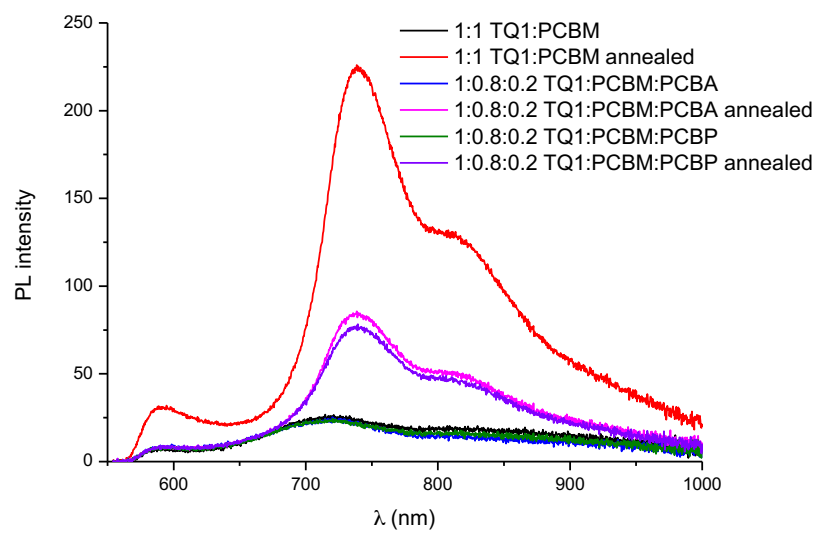

Figure S2. Photoluminescence spectra of TQ1:PCBM, TQ1:PCBM:PCBA and TQ1:PCBM:PCBP films before and after annealing at 140 °C for 10 min.

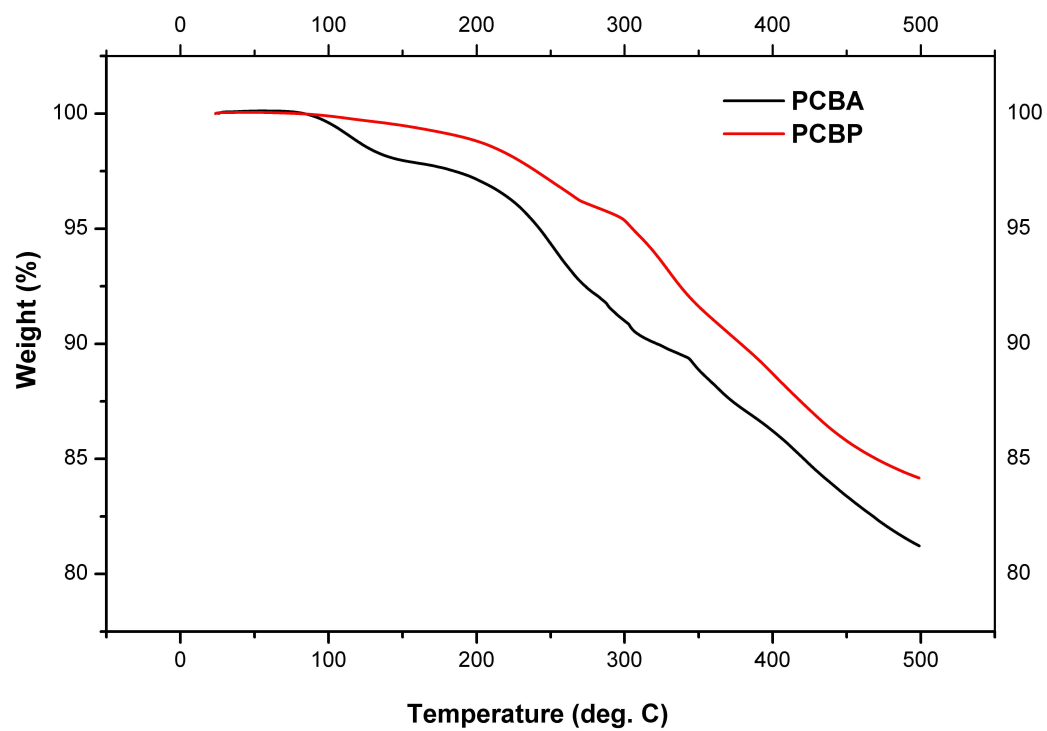

Figure S3. Thermo gravimetric analysis (TGA) of PBPA and PCBP.
